# Supplementary material
Source: MDPI journal article supplement (https://www.mdpi.com/2673-4591/56/1/135)
Supplement: s1 [file s1]

**2-(4-chlorobenzylidene)malononitrile (3a):** Colorless solid; m.p. (°C): 161-163; <sup>1</sup>H-NMR (400 MHz, CDCl<sub>3</sub>): δ 7.85 (d, 2H), 7.73 (s, 1H, HC=N), 7.52 (d, 2H); <sup>13</sup>C-NMR (100 MHz, CDCl<sub>3</sub>): δ 83, 112, 113, 129, 130, 131, 141, 158.

**Ethyl (E)-3-(4-Chlorophenyl)-2-cyano-2-propenoate (3b):** White crystalline solid, 88 - 90 °C; <sup>1</sup>H-NMR (400 MHz, CDCl<sub>3</sub>): δ 1.40 (t, 3H), 4.40 (q, 2H), 7.59 (d, 2H), 7.95 (d, 2H), 8.20 (s, 1H) ppm; EI-MS: m/z (%) = 235 [M<sup>+</sup>], 207, 190, 127, 75, 50.

**3-(4-Chlorobenzylidene)pentane-2,4-dione (3c):** white solid; m.p. 167 - 169°C; <sup>1</sup>H-NMR (300 MHz, CDCl<sub>3</sub>): δ 7.40 (s, 1H), 7.39 - 7.24 (m, 4H), 2.42 (s, 3H), 2.27 (s, 3H).

**Diethyl 2-(4-chlorobenzylidene)malonate (3d):** light Yellow oil, <sup>1</sup>H-NMR (300 MHz, CDCl<sub>3</sub>): δ 1.31- 1.25 (2t, 6H), 4.31-4.4 (2q, 4H), 7.45-7.30 (m, 4H, Ph), 7.7 (s, 1H, imine); <sup>13</sup>C NMR (100 MHz, CDCl<sub>3</sub>): 13.7, 13.8, 61.4, 61.7, 125.4, 129.0, 130.3, 130.4, 132.9, 140.0, 166.3, 163.8. MS (IE): Calc. for [M]<sup>+</sup> C<sub>14</sub>H<sub>15</sub>ClO<sub>4</sub>: 282.07; [M+H]<sup>+</sup> = 283 (100%).

**2-(4-Chlorobenzylidene)-5,5-dimethylcyclohexane-1,3-dione (3f):** Pale yellow; m.p. 126–128 °C; <sup>1</sup>H-NMR (300 MHz, DMSO-d<sub>6</sub>) δ 7.49–7.22 (m, 4H, C<sub>6</sub>H<sub>4</sub>), 6.07 (s, 1H, CH), 2.38, 2.21 (2s, 4H, 2CH<sub>2</sub>), 1.08, 1.05 (2s, 6H, 2CH<sub>3</sub>); <sup>13</sup>C-NMR (DMSO-d<sub>6</sub>, 75 MHz) δ 166.5, 164.2, 128.3, 126.5, 123.2, 121.3, 108.8, 103.3, 50.6, 36.8, 24.5; EIMS: m/z 262 [M]<sup>+</sup>; Calcd. for C<sub>15</sub>H<sub>15</sub>ClO<sub>2</sub> (262.73): C, 68.57; H, 5.75%. Found: C, 68.39; H, 6.02%.

**5-(4-Chloro-benzylidene)-2,2-dimethyl-[1, 3]dioxane-4,6-dione (3h):** Colorless solid; m.p. 154 – 156°C; <sup>1</sup>H-NMR (300 MHz, CDCl<sub>3</sub>, ppm): δ 8.37 (s, 1H), 8.03 (d, 2H), 7.46 (d, 2H), 1.81 (s, 6H); Elemental analysis: found C 58.70, H 4.25%, calculated for C<sub>13</sub>H<sub>11</sub>O<sub>4</sub>Cl; C 58.64, H 4.13%.

#### Spectral information:

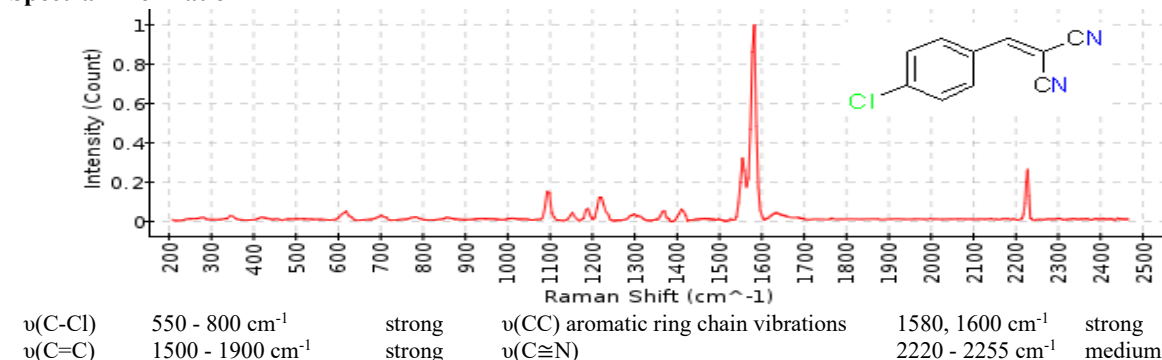

**Figure S1: Raman spectra of 2-(4-chlorobenzylidene)malononitrile (3a).**

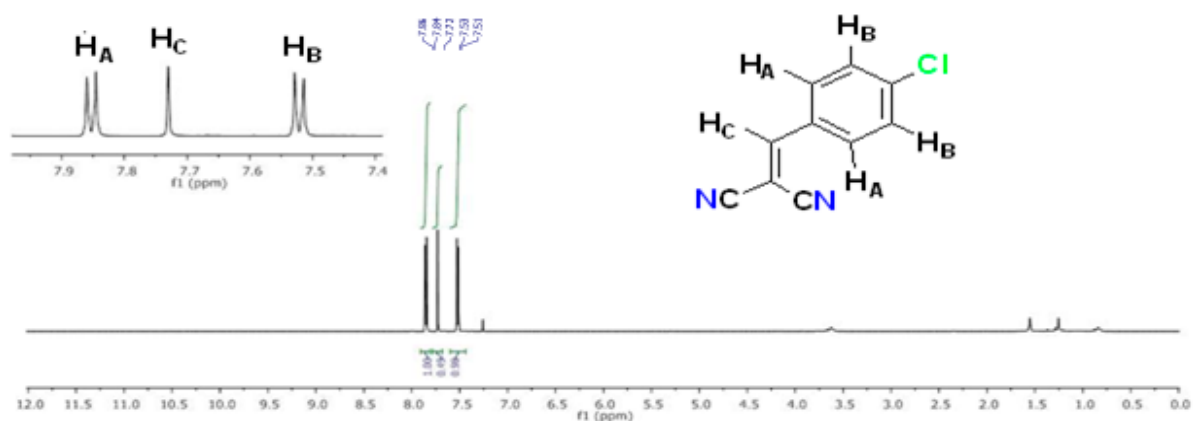

Figure S2: PMR spectra of 2-(4-chlorobenzylidene)malononitrile (3a) in CDCl<sub>3</sub>.

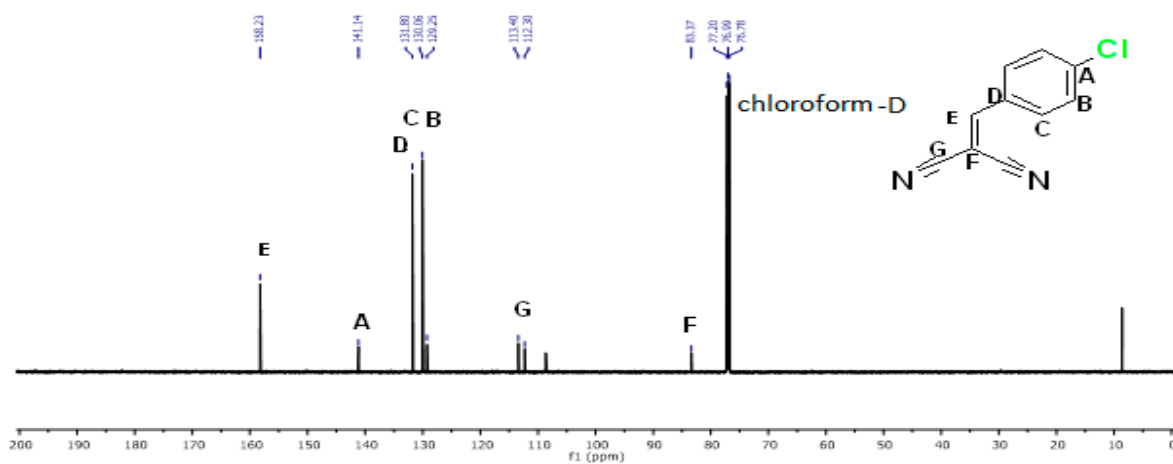

Figure S3: CMR spectra of 2-(4-chlorobenzylidene)malononitrile (3a) in CDCl<sub>3</sub>.

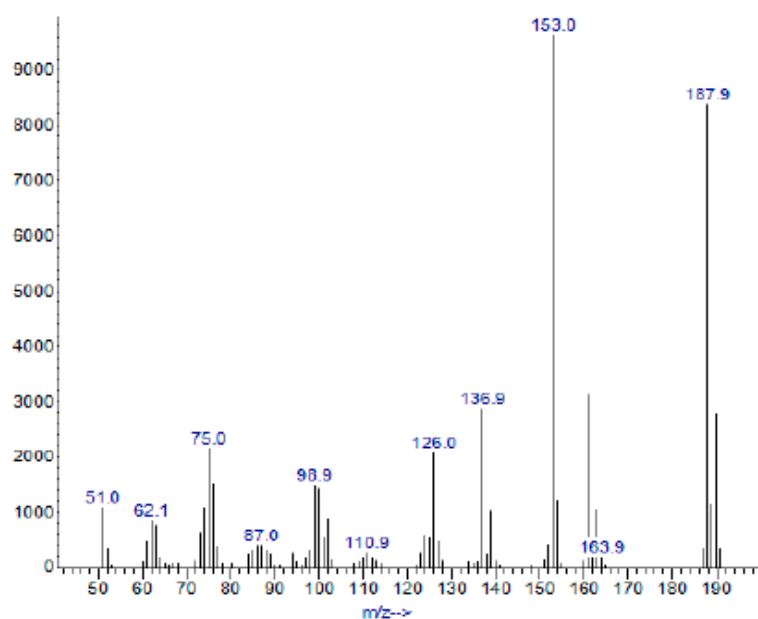

Figure S4: Mass spectra of 2-(4-chlorobenzylidene)malononitrile (3a).

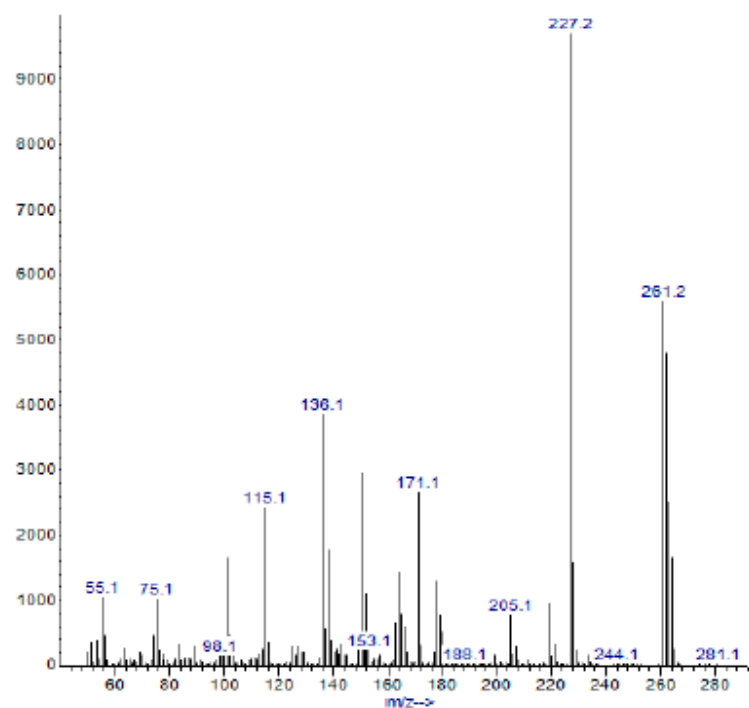

Figure S5: Mass spectra of 2-(4-Chlorobenzylidene)-5,5-dimethylcyclohexane-1,3-dione (3f)

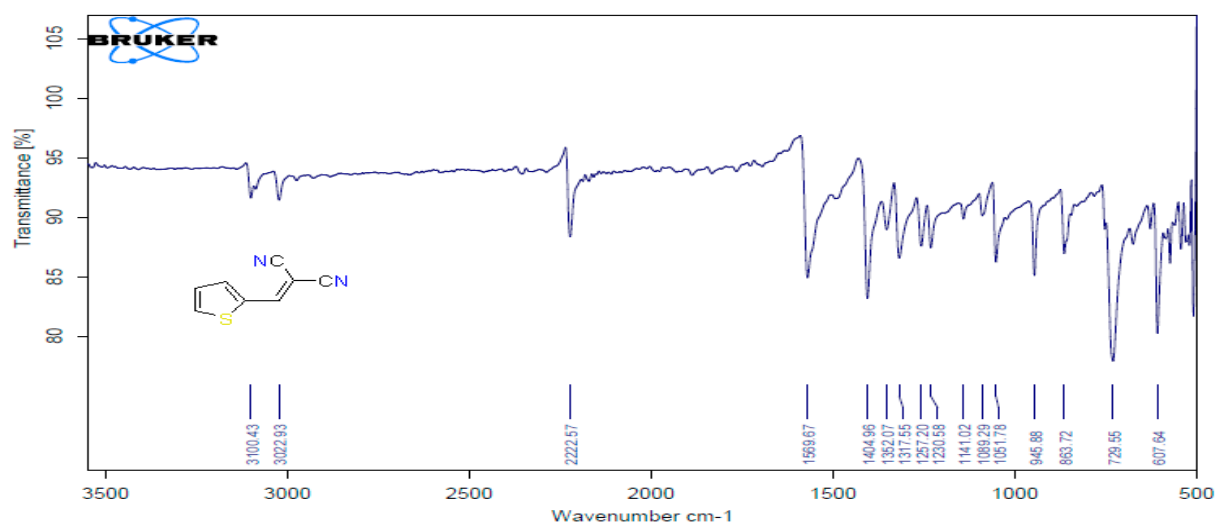

Figure S6: FTIR spectra of 2-(thiophen-2-ylmethylene)malononitrile (3k)

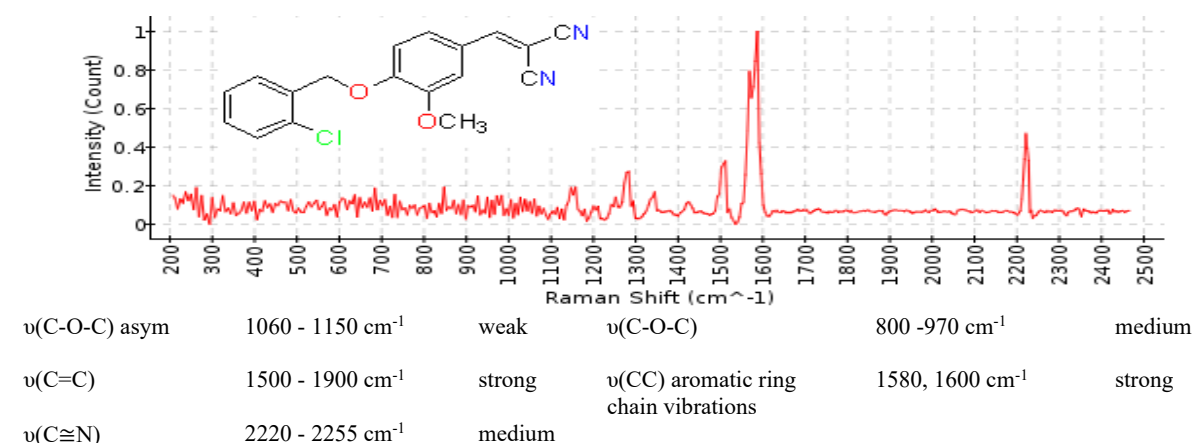

Figure S7: Raman spectra of 2-(4-((2-chlorobenzyl)oxy)-3-methoxybenzylidene)malononitrile (3I).

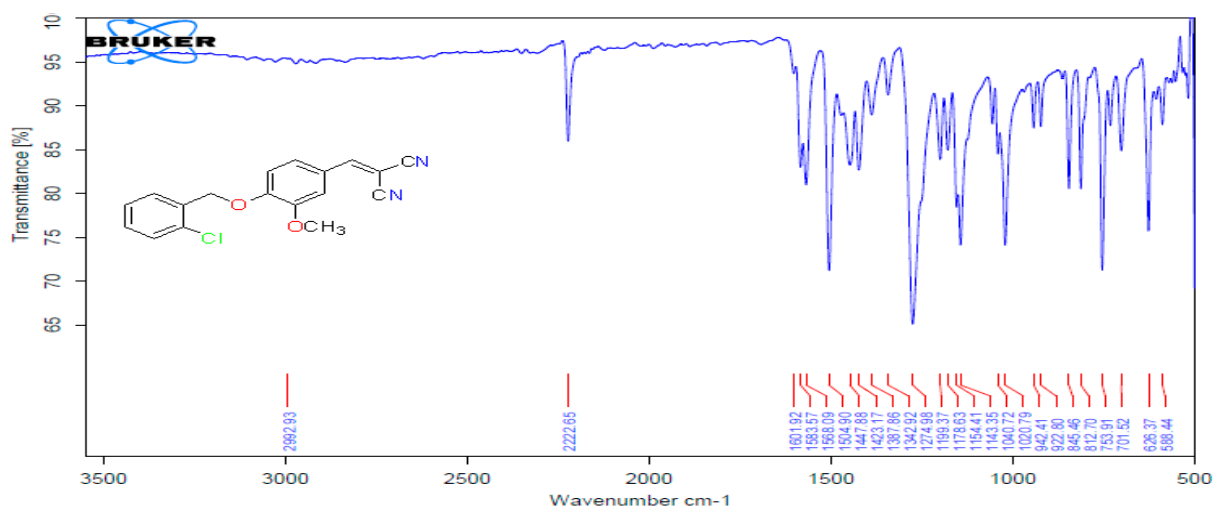

Figure S8: FTIR spectra of 2-(4-((2-chlorobenzyl)oxy)-3-methoxybenzylidene)malononitrile (3I).

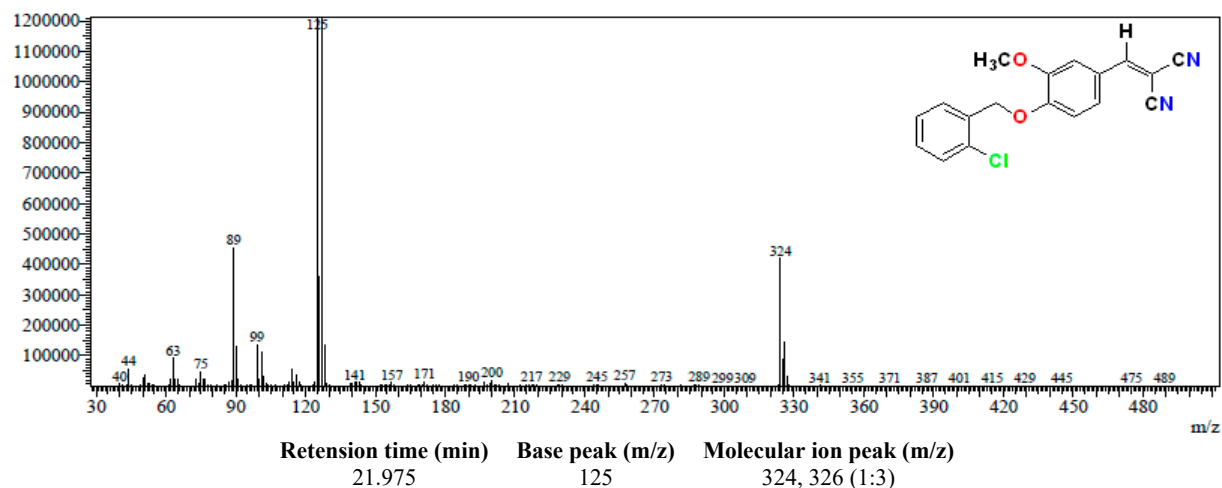

Figure S9: Mass spectra of 2-(4-((2-chlorobenzyl)oxy)-3-methoxybenzylidene)malononitrile (3I)

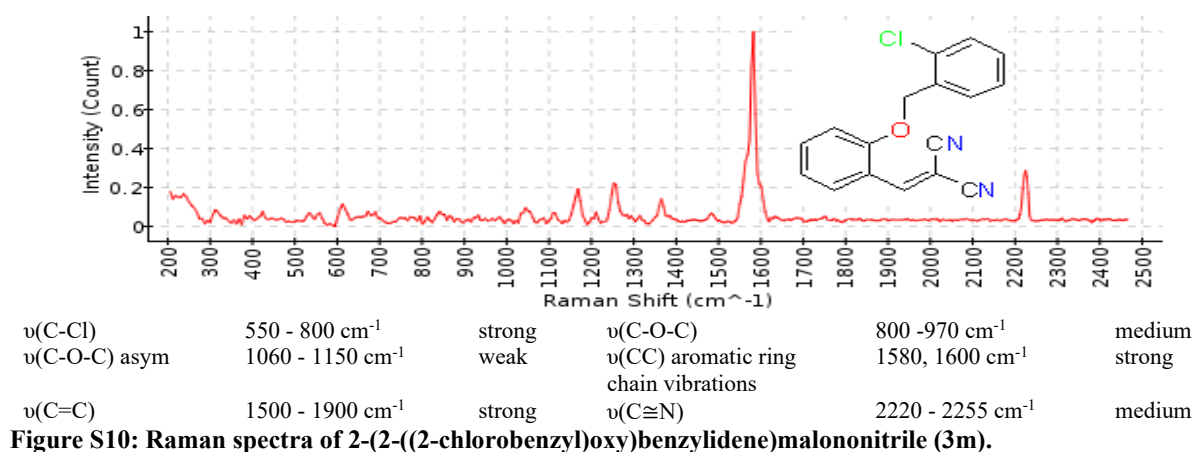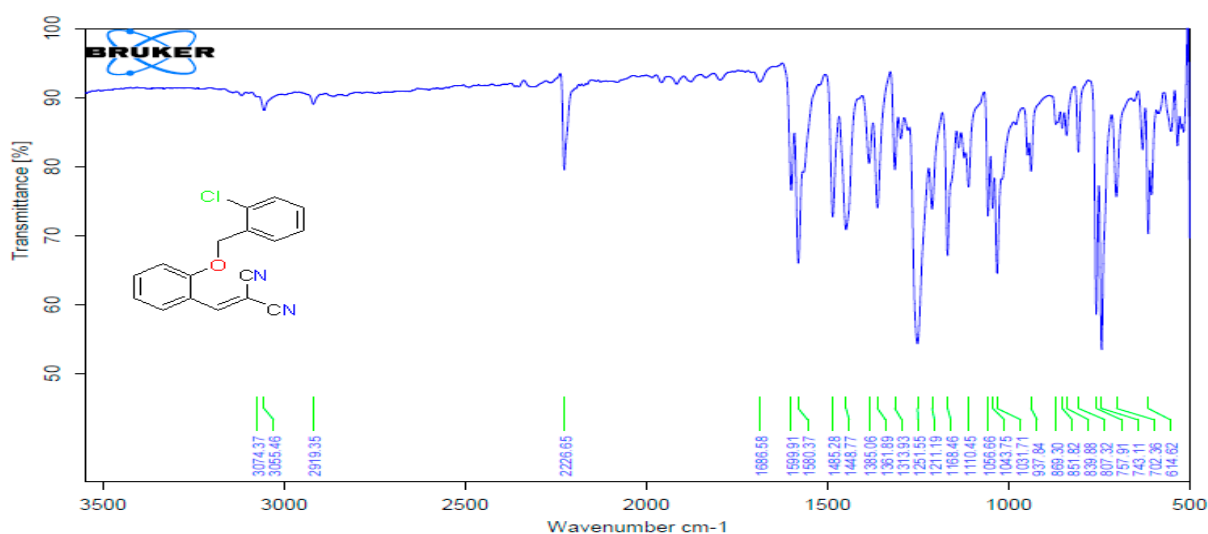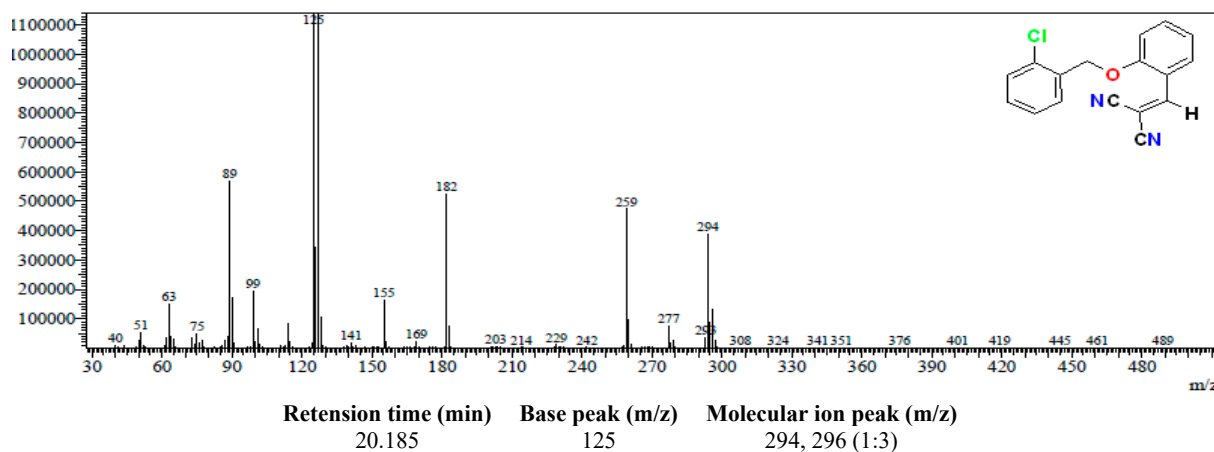

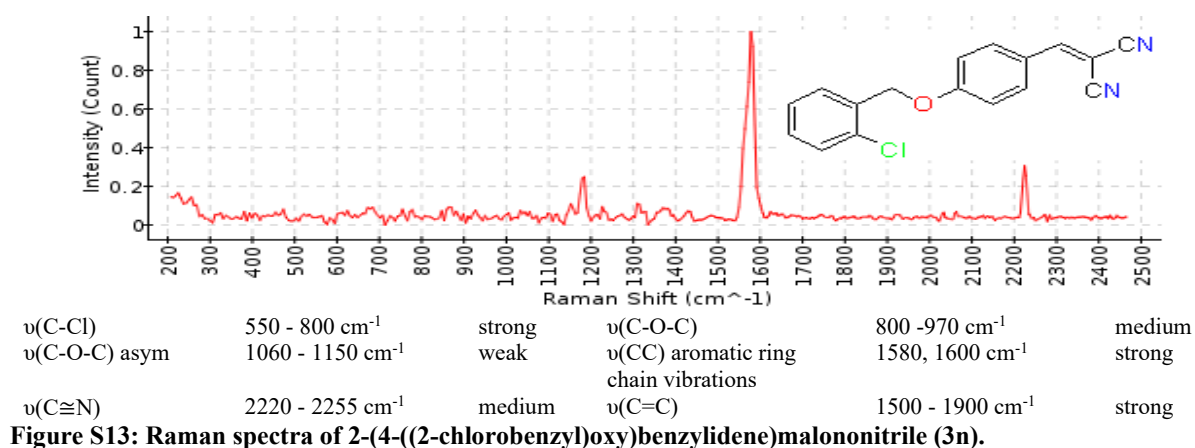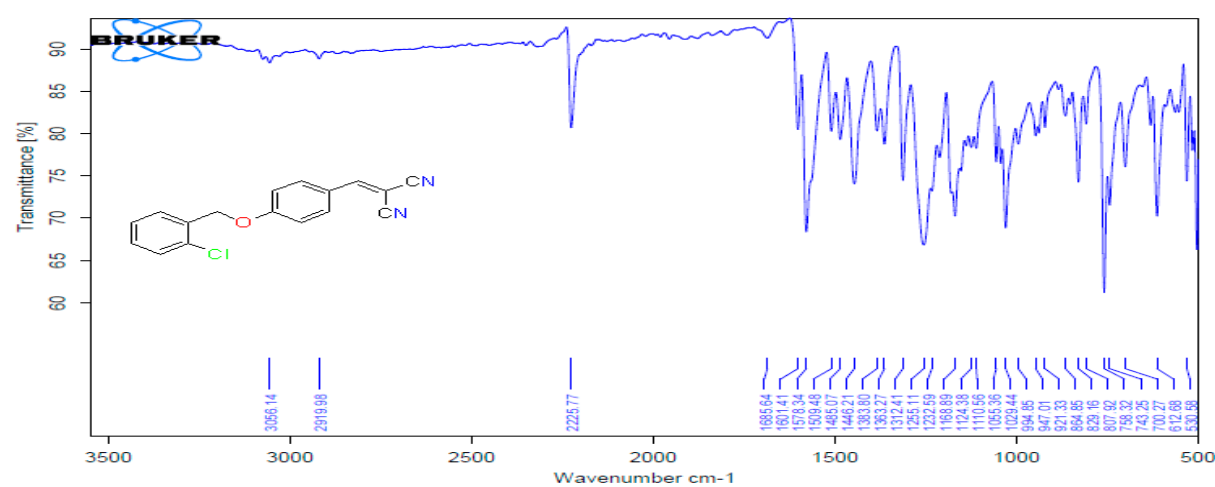

**Figure S14: FTIR spectra of 2-(4-((2-chlorobenzyl)oxy)benzylidene)malononitrile (3n).**

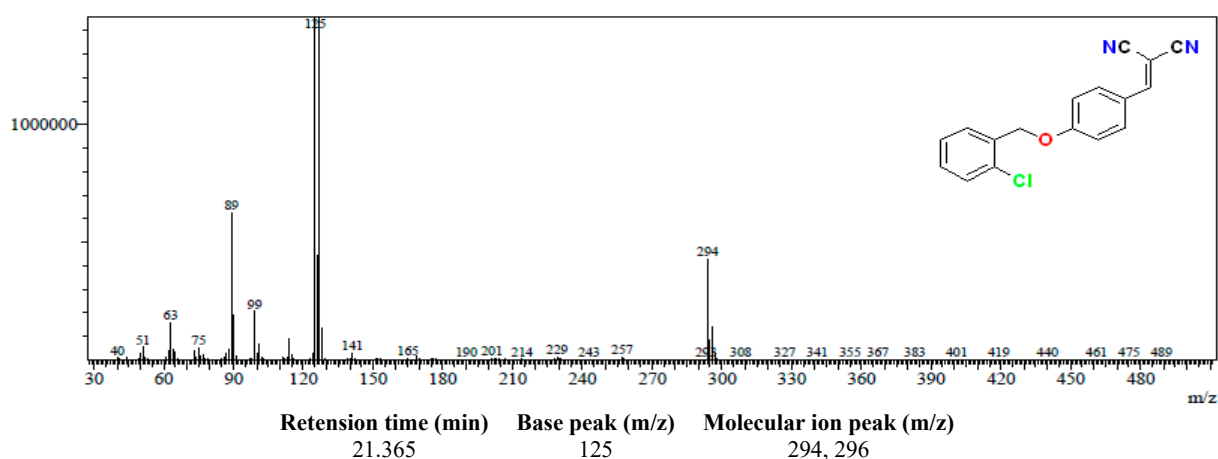

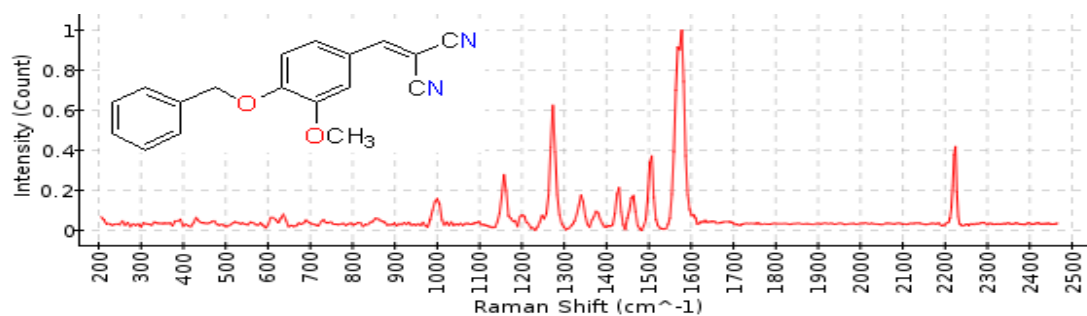

|                               |                              |        |                                                 |                             |        |
|-------------------------------|------------------------------|--------|-------------------------------------------------|-----------------------------|--------|
| $\nu(\text{C-O-C})$ asym      | 1060 - 1150 $\text{cm}^{-1}$ | weak   | $\nu(\text{C-O-C})$                             | 800 - 970 $\text{cm}^{-1}$  | medium |
| $\nu(\text{C}=\text{C})$      | 1500 - 1900 $\text{cm}^{-1}$ | strong | $\nu(\text{CC})$ aromatic ring chain vibrations | 1580, 1600 $\text{cm}^{-1}$ | strong |
| $\nu(\text{C}\equiv\text{N})$ | 2220 - 2255 $\text{cm}^{-1}$ | medium |                                                 |                             |        |

Figure S16: Raman spectra of 2-(4-(benzyloxy)-3-methoxybenzylidene)malononitrile (3o).

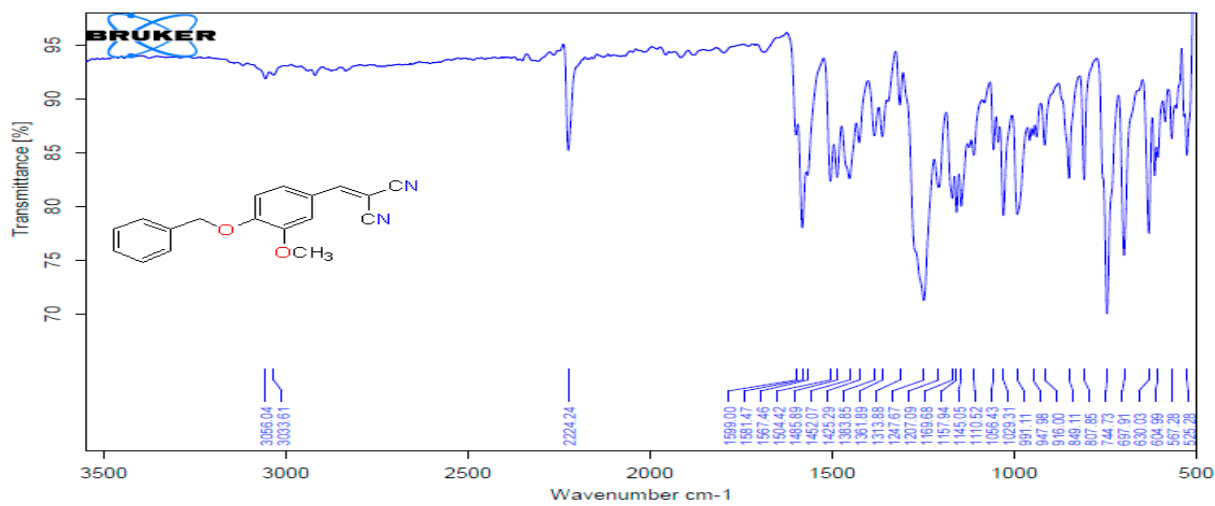

Figure S17: FTIR spectra of 2-(4-(benzyloxy)-3-methoxybenzylidene)malononitrile (3o).

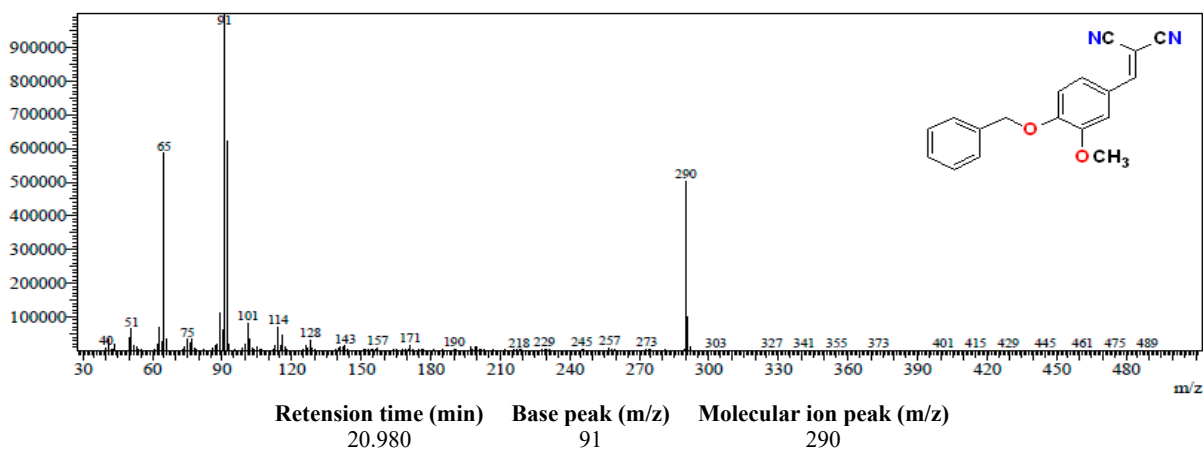

Figure S18: Mass spectra of 2-(4-(benzyloxy)-3-methoxybenzylidene)malononitrile (3o)

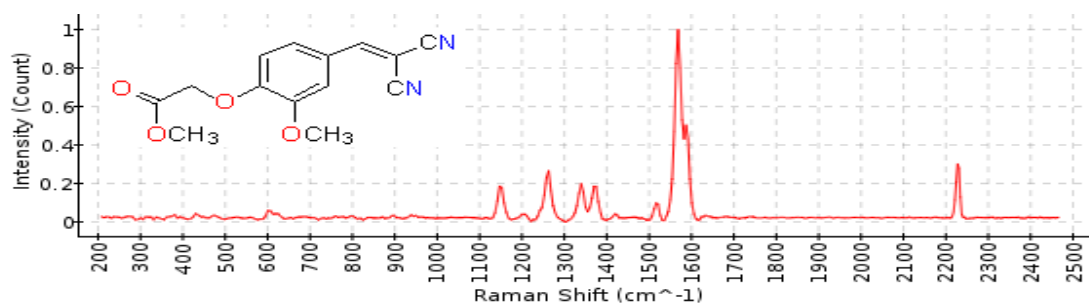

|                          |                              |        |                                                 |                              |        |
|--------------------------|------------------------------|--------|-------------------------------------------------|------------------------------|--------|
| $\nu(\text{C-O-C})$ asym | 1060 - 1150 $\text{cm}^{-1}$ | weak   | $\nu(\text{C-O-C})$                             | 800 - 970 $\text{cm}^{-1}$   | medium |
| $\nu(\text{C=O})$        | 1680 - 1820 $\text{cm}^{-1}$ | medium | $\nu(\text{CC})$ aromatic ring chain vibrations | 1580, 1600 $\text{cm}^{-1}$  | strong |
| $\nu(\text{C=C})$        | 1500 - 1900 $\text{cm}^{-1}$ | strong | $\nu(\text{C}\equiv\text{N})$                   | 2220 - 2255 $\text{cm}^{-1}$ | medium |

Figure S19: Raman spectra of methyl 2-(4-(2,2-dicyanovinyl)-2-methoxyphenoxy)acetate (3p).

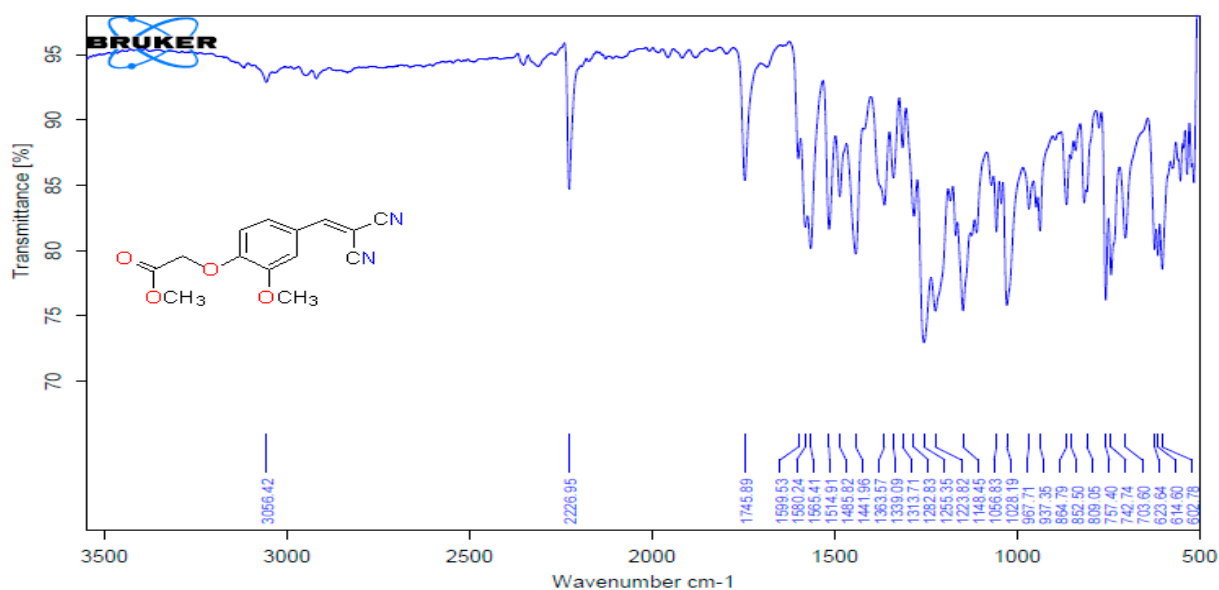

Figure S20: FTIR spectra of methyl 2-(4-(2,2-dicyanovinyl)-2-methoxyphenoxy)acetate (3p).

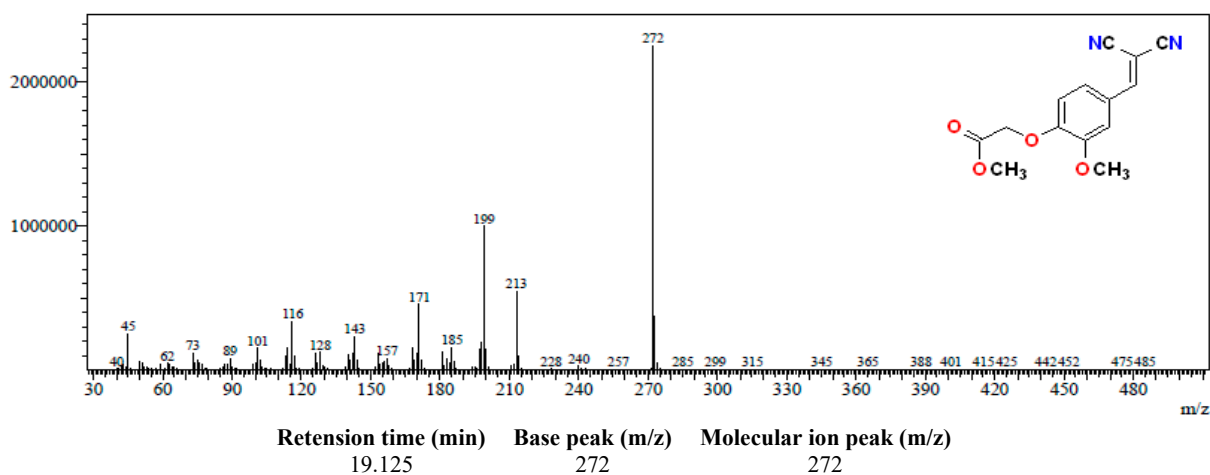

Figure S21: Mass spectra of methyl 2-(4-(2,2-dicyanovinyl)-2-methoxyphenoxy)acetate (3p)

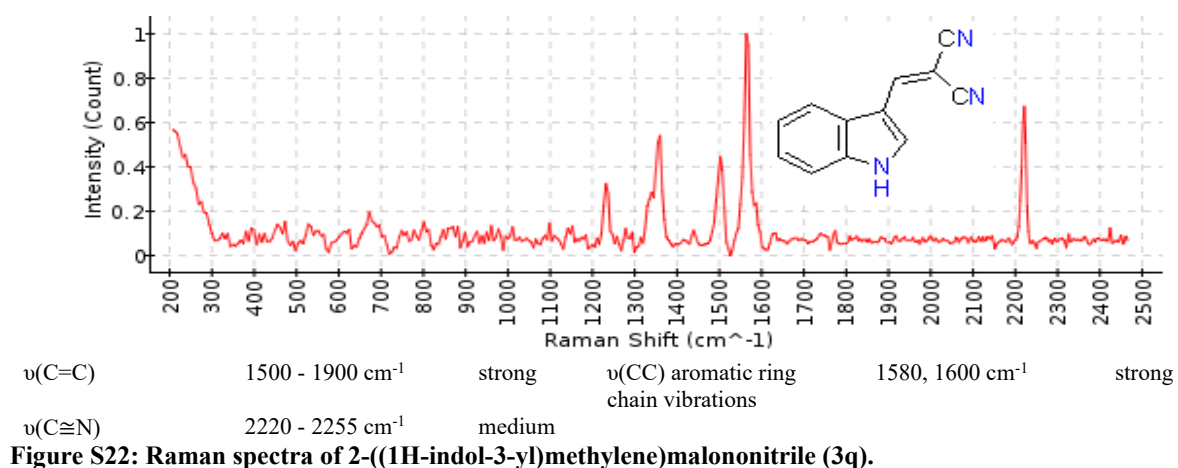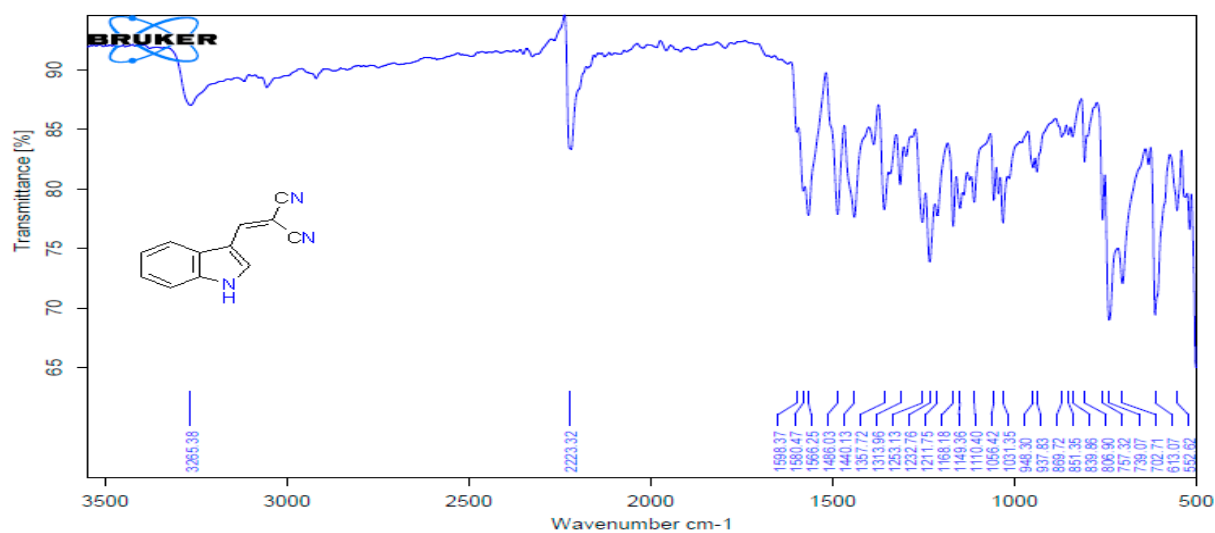

**Figure S23: FTIR spectra of 2-((1H-indol-3-yl)methylene)malononitrile (3q).**

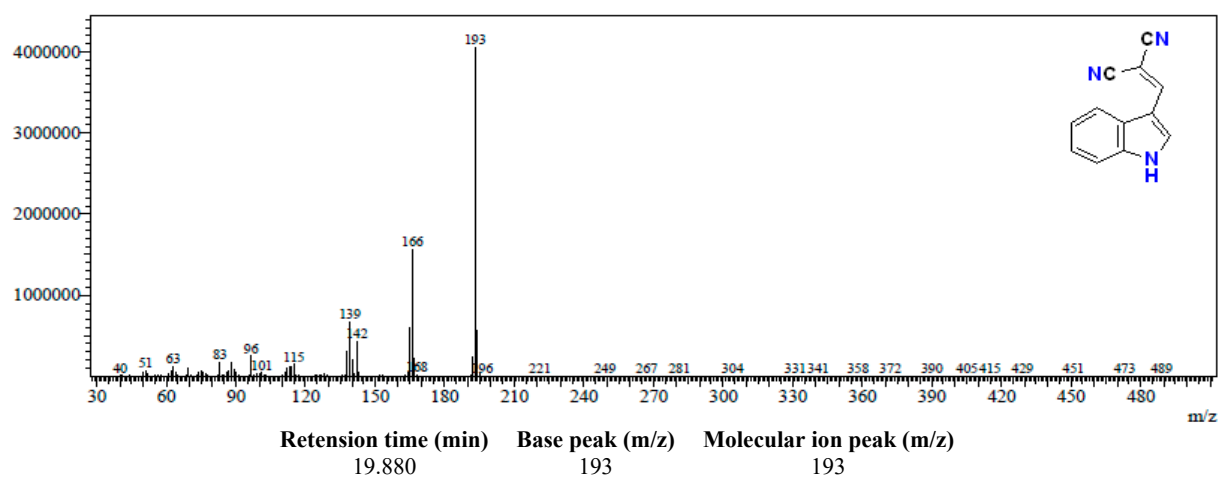

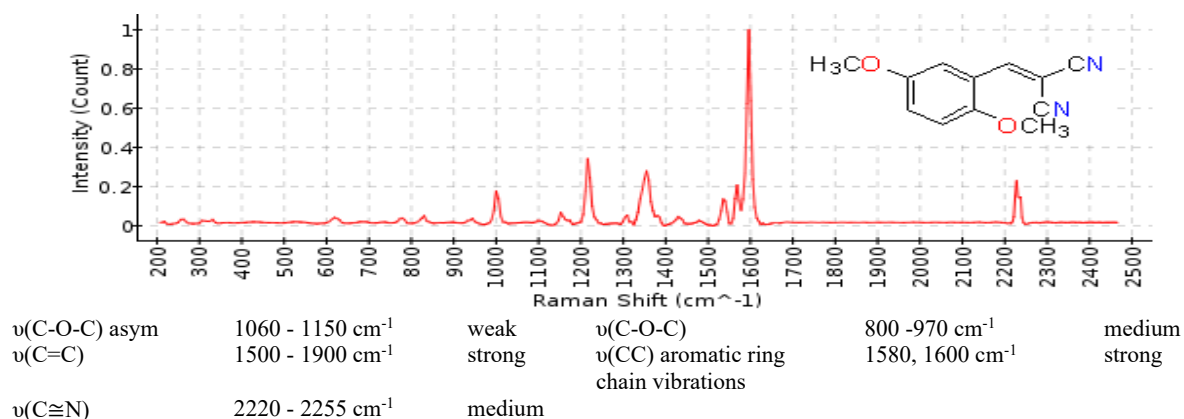

Figure S25: Raman spectra of 2-(2,5-dimethoxybenzylidene)malononitrile (3r).

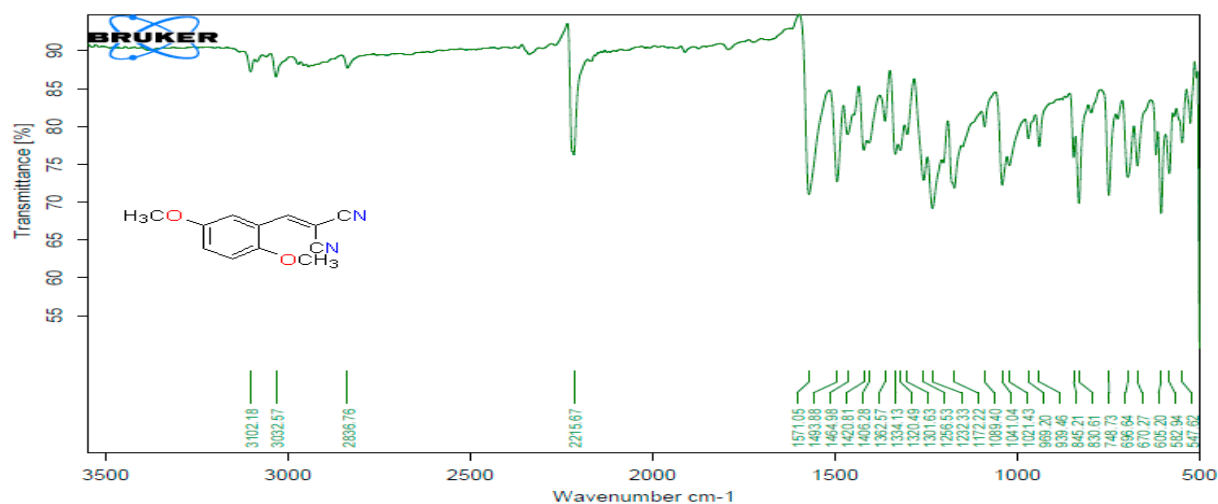

Figure S26: FTIR spectra of 2-(2,5-dimethoxybenzylidene)malononitrile (3r).

Line#1 R.Time:16.535(Scan#:2928)  
 MassPeaks:461  
 RawMode:Single 16.535(2928) BasePeak:199.00(1510166)  
 BG Mode:None Group 1 - Event 1 Scan

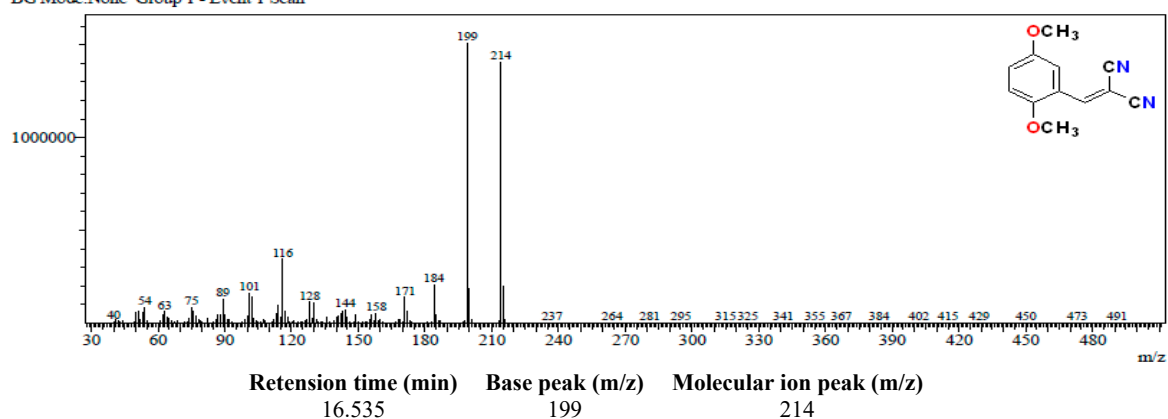

Figure S27: Mass spectra of 2-(2,5-dimethoxybenzylidene)malononitrile (3r)
